# Supplementary material
Source: HighWire-hosted journal article supplement (doi:10.1101/rna.080008.124)
Supplement: Supplemental_Material.xlsx [file Supplemental_Material.xlsx]

## Sheet: Sheet1
IRES	Sequence
Negative control	GCTTATCGATACCGTCGACCTCGAATCACTAGTCAGCTG
Gtx1-166	taaCCGCCGCCCATTCAGCGCAACAGCCGTCGGTCCTCTCGCTTTCCCGTAGGGGCCGTCGGCGTTCGTTTGAAACGCGGTCCACCCGTCCCAGCGTAGCCGGCGCTCTTCGGCGCCGCGCGCAAACTTCCCGAGCCGGCGGGTGCGGGCGGTGGCAGCGGGGCCCGGA
c-MYC	ACTAGAACTCGCTGTAGTAATTCCAGCGAGAGGCAGAGGGAGCGAGCGGGCGGCCGGCTAGGGTGGAAGAGCCGGGCGAGCAGAGCTGCGCTGCGGGCGTCCTGGGAAGGGAGATCCGGAGCGAATAGGGGGCTTCGCCTCTGGCCCAGCCCTCCCGCTGATCCCCCAGCCAGCGGTCCGCAACCCTTGCCGCATCCACGAAACTTTGCCCATAGCAGCGGGCGGGCACTTTGCACTGGAACTTACAACACCCGAGCAAGGACGCGACTCTCCCGACGCGGGGAGGCTATTCTGCCCATTTGGGGACACTTCCCCGCCGCTGCCAGGACCCGCTTCTCTGAAAGGCTCTCCTTGCAGCTGCTTAGACGCTGGATTTTTTTCGGGTAGTGGAAAACCAGC…
MAP2K3	CTAGGGCGCGCCAGTCCTAGATGCCATGAGCCGCCCAAGGCCTTCCCCTGGCACTGGCAAACAGGGCCTCTGCGGAGCACACTGGCTCACCCAGTCCTGCCCGCCACCGTTATCGGTGTCATTCACCTTTCGTGTTTTTTTTAATTTATCCTCTGTTGATTTTTTCTTTTGCTTTATGGGTTTGGCTTGTTTCGACTCGGACCGATGGTGAG
BIRC5	GCTGACAGCTTTGTTCGCGTGGGCAGAGCCTTCCACAGTGAATGTGTCTGGACCTCATGTTGTTGAGGCTGTCACAGTCCTGAGTGTGGACTTGGCAGGTGCCTGTTGAATCTGAGCTGCAGGTTCCTTATCTGTCACACCTGTGCCTCCTCAGAGGACAGTTTTTTTGCGACTCGGACCGATGGTGAG
HIF1α	CGCGAGGACTGTCCTCGCCGCCGTCGCGGGCAGTGTCTAGCCAGGCCTTGACAAGCTAGCCGGAGGAGCGCCTAGGAACCCGAGCCGGAGCTCAGCGAGCGCAGCCTGCACGCCCGCCTCGCGTCCCGGGGGGGTCCCGCCTCCCACCCCGCCTCTGGACTTGTCTCTTTCCCCGCGCGCGCGGACAGAGCCGGCGTTTAGGCCCGAGCGAGCCCGGGGGCCGCCGGCCGGGAAGACAACGCGGGCACCGATTCGCC
HCV (circular)	gccagcccccgattgggggccctgcgaggaaccactgtcctcacgcagaaagcgtctagccatgacgttagtatgagtgtcgtacagcctccaggaccccccctcccgggagagccaTACtggtctgcggaaccggtgagtacaccggaattgccgggaagactgggtcctttcttggatcaacccactctatgcccggagatttgggcgtgcccccgcgagactgctagccgagtagtgttgggtcgcgaaaggccttgtggtactgccGGATATggtgcttgcgagtgccccgggaggtctcgtagaccgtgcaccatgagcacgaatcctaaacctcaaagattaaccaaaagaaacaccgtccgtGGTACCaTC
HCV (bicistronic)	atagactatctagataattctagtgtacgtagccagcccccgattgggggcgacactccaccatagatcactcccctgtgaggaactactgtcttcacgcagaaagcgtctagccatggcgttagtatgagagtcgtgcagcctccaggaccccccctcccgggagagccatagtggtctgcggaaccggtgagtacaccggaattgccaggacgaccgggtcctttcttggatcaacccgctcaatgcctggagatttgggcgtgcccccgcaagactgctagccgagtagtgttgggtcgcgaaaggccttgtggtactgcctgatagggtgcttgcgagtgccccgggaggtctcgtagaccgtgcaccatgagcacgaatcctaaacctcaaaga…
EMCV	cacaaGCGAATTAATTCCGGTTATTTTCCACCATATTGCCGTCTTTTGGCAATGTGAGGGCgCGGAAACCTcGCCCTGTCTTCTTGACGAGCATTCCTAGGGGTCTTTCCCCTCTCGCCAAAGGAATGCAAGGTCTGTTGAATGTCGTGAAGGAAGCAGTTCCTCTGGAAGCTTCTTGAAGACAAACAACGTCTGTAGCGACCCTTTGCAGGCAGCGGAACCCCCCACCTGGCGACAGGTGCCTCTGCGGCCAAAAGCCACGTGTATAAGATACACCTGCAAAGGCGGCACAACCCCAGTGCCACGTTGTGAGTTGGATAGTTGTGGAAAGAGTCAAATGGCTCACCTCAAGCGTATTCAACAAGGGGCTGAAGGATGCCCAGAAGGTACCCCATTGTA…
EMCV (circular)	AAAAAAAACAAAAAAAAAACCAAAAAAACAAAACACATTAAAACCCCTCTCCCTCCCCCCCCCCTAACGTTACTGGCCGAAGCCGCTTGGAATAAGGCCGGTGTGCGTTTGTCTATATGTTATTTTCCACCATATTGCCGTCTTTTGGCAATGTGAGGGCCCGGAAACCTGGCCCTGTCTTCTTGACGAGCATTCCTAGGGGTCTTTCCCCTCTCGCCAAAGGAATGCAAGGTCTGTTGAATGTCGTGAAGGAAGCAGTTCCTCTGGAAGCTTCTTGAAGACAAACAACGTCTGTAGCGACCCTTTGCAGGCAGCGGAACCCCCCACCTGGCGACAGGTGCCTCTGCGGCCAAAAGCCACGTGTATAAGATACACCTGCAAAGGCGGCACAACCCCAGT…
HRV-B3	AAACAAAAAACAAAAAAAACAAAAAAAAAACCAAAAAAACAAAACACATTAAAATTAAAACAGCGGATGGGTACCCCACCATCCGACCCACTGGGTGTAGTACTCTGGTACTTCGTACCTTTGTACGCCTGTTCTTCCCATTGTACCCTTCCTGAACTTCCAACCCAAGTAACGTTAGAAGCTCAACATTTAGTACAACAGGAAGCACCACATCCAGTGGTGTTTAGTACAAGCACTTCTGTTTCCCCGGAGCGAGGTATAGGCTGTACCCACTGCCAAAAACCTTTAACCGTTATCCGCCAACCAACTACGTAAAAGCTAGTAGTATTATGTTTTTAACTAGGCGTTCGATCAGGTGGATTTCCCCTCCACTAGTTTGGTCGATGAGGCTAGGcATTC…
PV	AAACAAAAAACAAAAAAAACAAAAAAAAAACCAAAAAAACAAAACACATTAAAAttaaaacagctctggggttgtacccaccccagaggcccacgtggcggctagtactccggtattgcggtacccttgtacgcctgttttatactcccttcccgtaacttagacgcacaaaaccaagttcaatagaagggggtacaaaccagtaccaccacgaacaagcacttctgtttccccggtgatgtcgtatagactgcttgcgtggttgaaagcgacggatccgttatccgcttatgtacttcgagaagcccagtaccacctcggaatcttcgatgcgttgcgctcagcactcaaccccagagtgtagcttaggctgatgagtctggacatccctcaccggtg…
CVB3	AAACAAAAAACAAAAAAAACAAAAAAAAAACCAAAAAAACAAAACACATTAAAACAGCCTGTGGGTTGATCCCACCCACAGGCCCATTGGGCGCTAGCACTCTGGTATCACGGTACCTTTGTGCGCCTGTTTTATACCCCCTCCCCCAACTGTAACTTAGAAGTAACACACACCGATCAACAGTCAGCGTGGCACACCAGCCACGTTTTGATCAAGCACTTCTGTTACCCCGGACTGAGTATCAATAGACTGCTCACGCGGTTGAAGGAGAAAGCGTTCGTTATCCGGCCAACTACTTCGAAAAACCTAGTAACACCGTGGAAGTTGCAGAGTGTTTCGCTCAGCACTACCCCAGTGTAGATCAGGTCGATGAGTCACCGCATTCCCCACGGGCGACCG…
hPGK	gaattcggggttggggttgcgccttttccaaggcagccctgggtttgcgcagggacgcggctgctctgggcgtggttccgggaaacgcagcggcgccgaccctgggtctcgcacattcttcacgtccgttcgcagcgtcacccggatcttcgccgctacccttgtgggccccccggcgacgcttcctgctccgcccctaagtcgggaaggttccttgcggttcgcggcgtgccggacgtgacaaacggaagccgcacgtctcactagtaccctcgcagacggacagcgccagggagcaatggcagcgcgccgaccgcgatgggctgtggccaatagcggctgctcagcagggcgcgccgagagcagcggccgggaaggggcggtgcgggaggcggggtg…
CHD2	GAATTCATAGAGTGGGGGGTGGAAGATGATTCTCGCCTGTTGCTGGGGATTTATGAACATGGCTATGGAAACTGGGAGTTAATTAAAACAGACCCAGAGCTTAAATTAACTGACAAAATTCTGCCGGTGGAGACAGATAAAAAGCCTCAGGGGAAGCAGCTACAGACCCGAGCGGATTACTcgATGCGTACGTCA
TGFBR3	GAATTCTCCACCATGAAGCAGAATCTAAAGAAAAAGGTCCAAGCATGAAGGAACCAAATCCAATTTCTCCACCAATTTTCCATGGTCTGGACACCCTAACCGTGATGGGCATTGCGTTTGCAGCCTTTGTGATCGGAGCACTCCTGACGGGGGCCTTGTGGTACATCTATTCTCACACAATGCGTACGTC
IGFR2	GAATTCGGCGCGCCAGTCCTCCAACTGAACTACAGAGGCGGCACACCCTATAACAATGAAAGACACACACCGAGAGCTACGCTCATCACCTTTCTCTGTGATCGAGACGCGGGAGTGGGCTTCCCTGAATATCAGGAAGAGGATAACTCCACCTACAACTTCCGGTGGTACACCAGCTATGCCTGCCCGGAGGACGACatgCGTACGaata
circZNF609	GAATTCCAATGATGTTGTCCACTGGGCATGTACTGACCAATGTGGCAGGTCTGAGAACATAGCTGAAGCTGAAAATAGGAAAGCTGGGGGCAAGGAAGAGCCTTGAATCTTGAGGTGGGACGTTGACTCTAAGATGCGTACGTC
Forward GAPDH primer	AAGGTCGGAGTCAACGGATT
Reverse GAPDH primer	TGAGGTCAATGAAGGGGTCA
Forward divergent primer for qPCR of circular RNA
	GTTCCGAGTAACCATCAACAGC
Reverse divergent primer for qPCR of circular RNA	AGAAGAGGATCTGGAAGAGTGA
